# Supplementary material for: Cross-boundary footprints: Modelling biodiversity responses to urbanization, agriculture, and climate variability
Source: Research Square preprint supplement (doi:10.21203/rs.3.rs-7674377/v1), 2025-11-04
Supplement: Supplementary file 1 [file 0caa474fe7ceb7ec260b6725.docx]

**Supplementary Materials**

**S1. Taxonomic Groups Included in the Analysis**

The classification of organisms follows established taxonomic categories to ensure comprehensive coverage of biodiversity components across multiple trophic levels and habitat types. Vertebrates—including mammals, birds, reptiles, amphibians, and fishes—were prioritized as sensitive indicators of habitat quality, often directly affected by urbanization and land-use pressures. Invertebrates were also systematically represented, including crustaceans, odonates, butterflies, moths, beetles, spiders, mollusks, and other groups (see Table S1). Plants and lower organisms were integrated to capture primary producers and decomposers, including angiosperms, gymnosperms, ferns, lycophytes, mosses, fungi, and algae.

This taxonomic breadth allows the biodiversity indicator, based on species richness and the Shannon–Wiener Index (H′), to reflect both richness and evenness under urbanization and climate pressures.

**S2. Biodiversity Indices and Analytical Framework**

The biodiversity analysis combined two classical indicators: species richness and the Shannon–Wiener Index (H′). These were integrated with socio-economic, infrastructural, and climatic variables derived from official datasets and long-term climate records. This framework enabled assessment of how urbanization, economic activity, land use, and climate variability jointly shape biodiversity across 22 administrative units.

Table S1 Taxonomic groups used in the Shannon–Wiener Index

|  | **Taxonomic Group** | **Description** |
| --- | --- | --- |
| **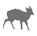** | **Mammals** | Warm-blooded vertebrates including primates, carnivores, rodents, and others. |
| **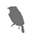** | **Birds** | Feathered vertebrates, including both resident and migratory species. |
| **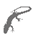** | **Reptiles** | Cold-blooded vertebrates such as snakes, turtles, and lizards. |
| **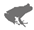** | **Amphibians** | Vertebrates with dual aquatic and terrestrial life cycles, such as frogs, toads, and salamanders. |
| **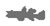** | **Fishes (Fish)** | Aquatic vertebrates, including both bony fishes and cartilaginous fishes. |
| **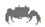** | **Crustaceans (Shrimps and Crabs)** | Arthropods of the class Crustacea, such as shrimps, crabs, and lobsters. |
| **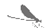** | **Odonates (Dragonflies and Damselflies)** | Semi-aquatic insects including dragonflies and damselflies. |
| **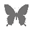** | **Butterflies** | Insects of the order Lepidoptera, mostly diurnal. |
| **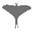** | **Moths** | Insects of the order Lepidoptera, mostly nocturnal. |
| **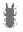** | **Beetles** | Insects of the order Coleoptera, such as scarabs and stag beetles. |
| **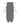** | **Other Insects** | Insects not classified in the above groups, e.g., mosquitoes, flies, grasshoppers. |
| **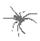** | **Spiders** | Arachnids, eight-legged predatory invertebrates. |
| **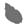** | **Snails and Mollusks** | Mollusks including snails, clams, and slugs. |
| **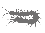** | **Other Invertebrates** | Invertebrate animals not listed above, such as worms. |
| **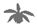** | **Angiosperms (Flowering Plants)** | Seed-bearing plants with flowers, the dominant group in terrestrial ecosystems. |
| **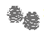** | **Gymnosperms** | Non-flowering seed plants, such as pines and cypresses. |
| **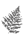** | **Ferns** | Spore-bearing vascular plants without flowers. |
| **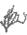** | **Lycophytes** | Primitive vascular plants such as club mosses and selaginellas. |
| **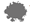** | **Mosses** | Non-vascular plants typically found in moist environments. |
| **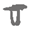** | **Fungi** | Organisms including molds, yeasts, and mushrooms. |
| **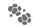** | **Algae** | Aquatic photosynthetic organisms, including green, brown, and red algae. |

**S3. Local Indicators of Spatial Association (LISA) Clusters**

LISA cluster maps illustrate spatial patterns of biodiversity across the 21 taxonomic groups. Representative results are shown in the main text (Fig. 2–Fig. 5), while the complete set of cluster maps is provided here as Supplementary Fig. S1–Fig. S21.

|   **Fig. S1** LISA clusters of Mammals |   **Fig. S2** LISA clusters of Birds |
| --- | --- |
|   **Fig. S3** LISA clusters of Reptiles |   **Fig. S4** LISA clusters of Amphibians |
|   **Fig. S5** LISA clusters of Fishes |   **Fig. S6** LISA clusters of Crustaceans |
|   **Fig. S7** LISA clusters of Odonates |   **Fig. S8** LISA clusters of Butterflies |
|   **Fig. S9** LISA clusters of Moths |   **Fig. S10** LISA clusters of Beetles |
|   **Fig. S11** LISA clusters of Other Insects |   **Fig. S12** LISA clusters of Spiders |
|   **Fig. S13** LISA clusters of Snails & Shellfish |   **Fig. S14** LISA clusters of Other Invertebrates |
|   **Fig. S15** LISA clusters of Angiosperms |   **Fig. S16** LISA clusters of Gymnosperms |
|   **Fig. S17** LISA clusters of Ferns |   **Fig. S18** LISA clusters of Lycolypine |
|   **Fig. S19** LISA clusters of Moss |   **Fig. S20** LISA clusters of Fungi |
|   **Fig. S21** LISA clusters of Algae |  |
